# Supplementary material
Source: PubMed Central journal article supplement (PMC4789913)
Supplement: mcmd003957.ww1_default.pdf [file mcmd003957.ww1_default.pdf]

## **Appendix: Bone Cement, Hip Replacements and Hip Resurfacings [posted as supplied by author]**

Primary hip arthritis is essentially a disease of the articulating surfaces. Therefore it has always been an attractive concept to offer artificial surfaces as a solution. Earlier attempts to resurface hips starting in the 1960s were hampered by the absence of appropriate materials which could be manufactured as thin components offering both mechanical strength and wear resistance.

Therefore total hip replacements (THRs) were developed as an alternative, employing a small femoral head component on a long femoral stem fixed in the medullary canal of the femur (Figure). In order to fix the implants to bone, acrylic bone cement<sup>1 2</sup> (which was then being used in dental surgery) became the favourite choice (Figure A) and has continued to be the most widely used fixation in the United Kingdom until recently. However, cement disease<sup>3 4</sup> was blamed for implant failures and cement fell out of favour in certain regions. This led to the development of fixation methods without the use of cement<sup>5 6 7</sup> (Figure B) and over 90% of implants in the United States are now fixed without cement. Sometimes one component is fixed without cement while the other is cemented and these are called 'hybrid' or 'reverse hybrid' depending on which component is cemented.

Although hip arthritis is common in relatively older patients, it occurs in young and active patients too. In the young the performance of all types of THRs is poor. Charnley warned against the use of THRs in young patients, unless there were other overbearing restraining factors which would limit their activities even after their hip replacement. The Swedish Hip Register<sup>8 9</sup> showed that even with improved THR technology being available now,<sup>10</sup> 10-year implant survival in young men for cemented and uncemented THRs is as low as 66%, leading them to suggest the use of conservative methods in the young.

It is for such young men that modern metal-on-metal hip resurfacing (Figure C) was developed in Birmingham, England, as a conservative alternative. This was made possible by advances in manufacturing methods and improved tolerances. With the Birmingham Hip Resurfacing (BHR) the Australian Register<sup>11</sup> (94% implant survival at 10 years) and other reports<sup>12 13 14</sup> show excellent results in predominantly young patients offering better function and better survivorship than THRs at 10 years and more.

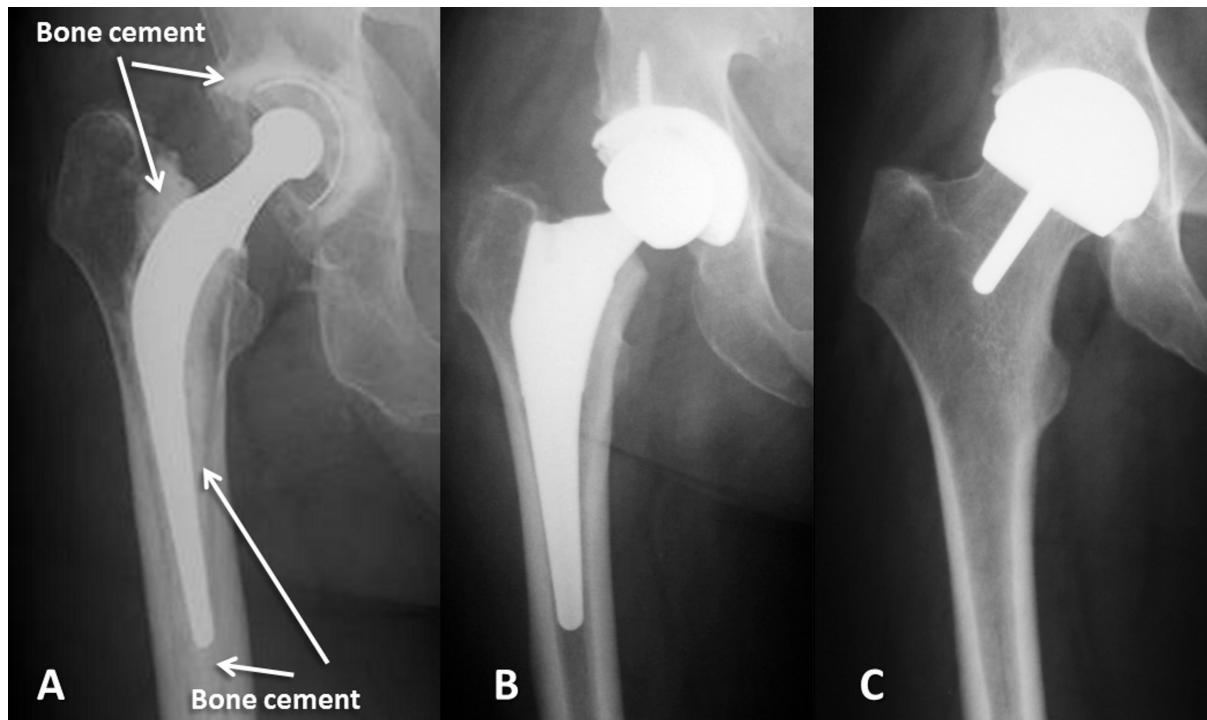

Images of a cemented THR (A), an uncemented THR (B) and a Birmingham Hip Resurfacing (C)

---

## References

- <sup>1</sup> Charnley J, A biomechanical analysis of the use of cement to anchor the femoral head prosthesis. *J Bone Joint Surg. Br.*1965: 47; 354-63.
- <sup>2</sup> Charnley J, Follacci FM, Hammond BT. The long-term reaction of bone to self-curing acrylic cement. *J Bone Joint Surg. Br.* 1968: 50; 822-29.
- <sup>3</sup> Jones LC, Hungerford DS. Cement disease. *Clin Orthop Relat Res.* 1987 Dec;(225):192-206. Review.
- <sup>4</sup> Lennox DW, Schofield BH, McDonald DF, Riley LH Jr. A histologic comparison of aseptic loosening of cemented, press-fit, and biologic ingrowth prostheses. *Clin Orthop Relat Res.* 1987 Dec;(225):171-91
- <sup>5</sup> Wixson RL, Stulberg SD, Mehlhoff M. Total hip replacement with cemented, uncemented, and hybrid prostheses. A comparison of clinical and radiographic results at two to four years. *J Bone Joint Surg Am.* 1991 Feb;73(2):257-70.
- <sup>6</sup> Hozack WJ, Rothman RH, Booth RE Jr, Balderston RA. Cemented versus cementless total hip arthroplasty. A comparative study of equivalent patient populations. *Clin Orthop Relat Res.* 1993 Apr;(289):161-5
- <sup>7</sup> Wroblewski BM. Cementless versus cemented total hip arthroplasty. A scientific controversy? *Orthop Clin North Am.* 1993 Oct;24(4):591-7. Review.
- <sup>8</sup> Malchau H, Herberts P. Prognosis of total hip replacement. Revision and re-revision rate in THR: A revision-study of 148.359 primary operations. Scientific exhibition at 65th Annual Meeting of the American Academy of Orthopaedic Surgeons, New Orleans, USA, March 19-23, 1998
- <sup>9</sup> Malchau H, Herberts P. Swedish Hip Register 2000. <https://www.jru.orthop.gu.se/archive/AAOS-2000-NHR.pdf>
- <sup>10</sup> Hilmarsson S, Soderman P, Herbert P, Malchau H. An Epidemiological Analysis Of A Young Total Hip Replacement Population In Sweden. *Journal of Bone and Joint Surgery - British Volume*, Vol 88-B, Issue SUPP\_I, 47-48. [http://proceedings.jbjs.org.uk/cgi/content/abstract/88-B/SUPP\\_I/47-c](http://proceedings.jbjs.org.uk/cgi/content/abstract/88-B/SUPP_I/47-c)

---

<sup>11</sup> Australian Orthopaedic Association, National Joint Replacement Registry. 2010  
[http://www.dmac.adelaide.edu.au/aoanjrr/documents/aoanjrrreport\\_2010.pdf](http://www.dmac.adelaide.edu.au/aoanjrr/documents/aoanjrrreport_2010.pdf)

<sup>12</sup> Treacy RB, McBryde CW, Shears E, Pynsent PB. Birmingham hip resurfacing: a minimum follow-up of ten years. *J Bone Joint Surg Br.* 2011 Jan;93(1):27-33

<sup>13</sup> McMinn DJ, Daniel J, Ziaee H, Pradhan C. Indications and results of hip resurfacing. *Int Orthop.* 2011 Feb;35(2):231-7

<sup>14</sup> Baker RP, Pollard TC, Eastaugh-Waring SJ, Bannister GC. A medium-term comparison of hybrid hip replacement and Birmingham hip resurfacing in active young patients. *J Bone Joint Surg Br.* 2011 Feb;93(2):158-63
